# Supplementary material for: Metagenomic surveillance for bacterial tick-borne pathogens using nanopore adaptive sampling
Source: PubMed Central journal article supplement (PMC10328957; doi:10.1038/s41598-023-37134-9), 2023-07-07
Supplement: 41598_2023_37134_MOESM1_ESM.pdf [file 41598_2023_37134_MOESM1_ESM.pdf]

## **Supplementary Information**

### **Metagenomic surveillance for bacterial tick-borne pathogens using nanopore adaptive sampling**

Evan J. Kipp, Laramie L. Lindsey, Benedict Khoo, Christopher Faulk, Jonathan D. Oliver, Peter A. Larsen

**A**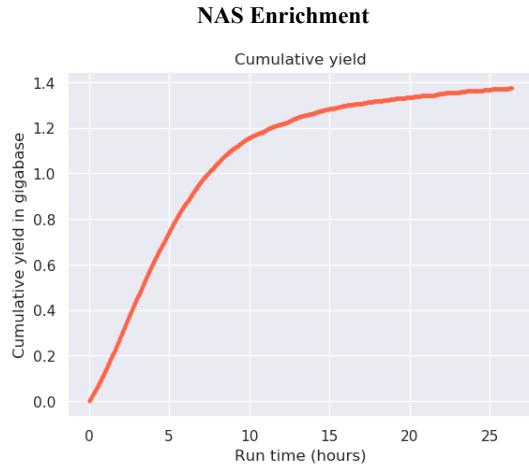**B**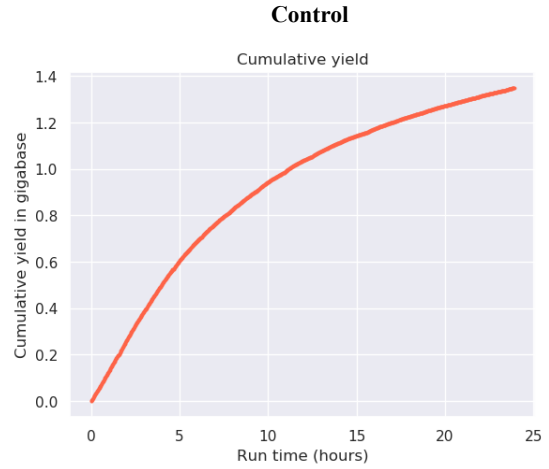

**Supplementary Figure 1.** Total raw sequencing output by run time over NAS enrichment (A) and control (B) sequencing experiments. Total data generated for each barcoded tick (Tick 1 – Tick 4) were comparable between both libraries sequenced during each experiment.

**A**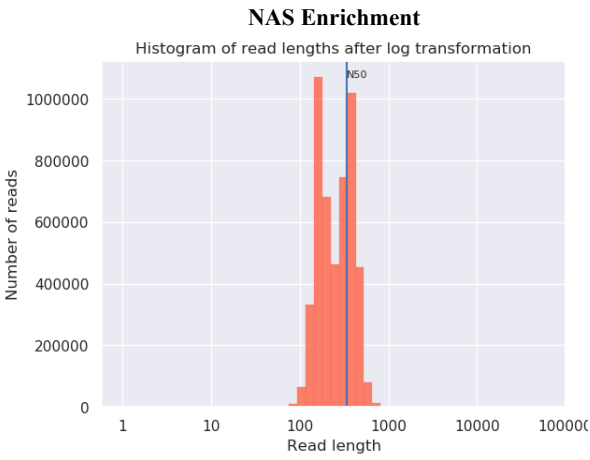**B**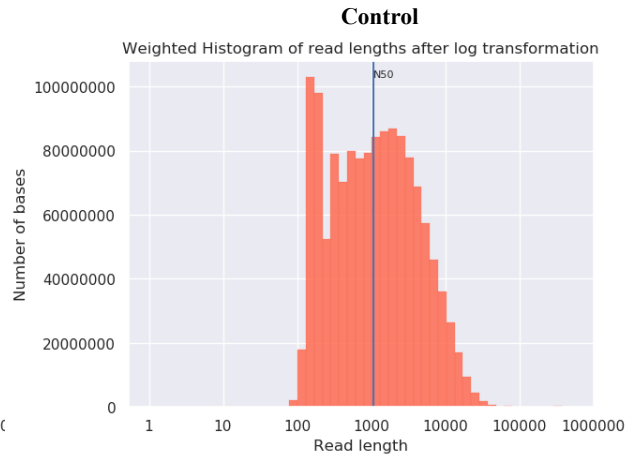

**Supplementary Figure 2.** Comparison of log-transformed read lengths of raw data generated during paired NAS enrichment (A) and control (B) sequencing experiments. The shorter average read length and N50 seen during NAS enrichment is suggestive of non-target sequences rejected from sequencing during adaptive sampling.

**A**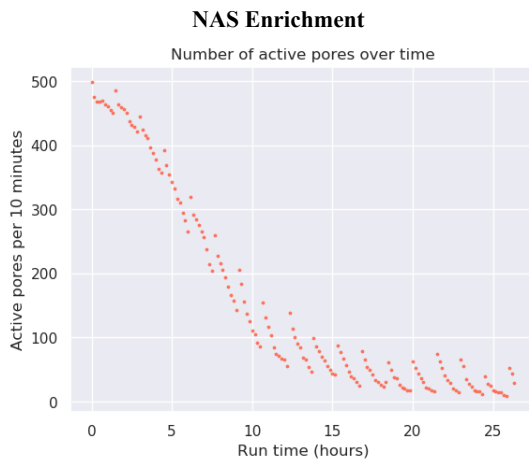**B**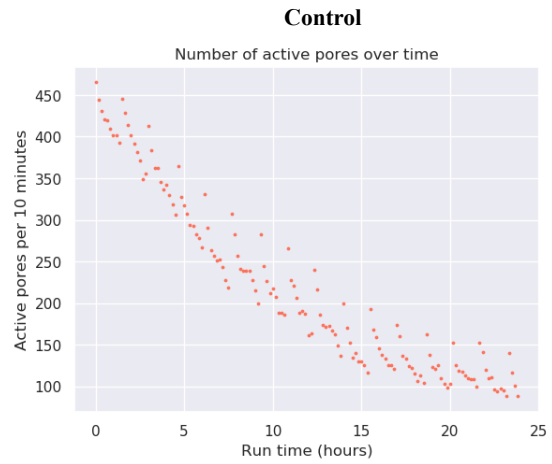

**Supplementary Figure 3.** Comparison of nanopores available for sequencing by run time for paired NAS enrichment (A) and control (B) sequencing experiments. Note the more rapid decrease in active pores for NAS enrichment run likely caused by pore stress imposed by NAS-based rejection of unmapped, non-target DNA molecules.

**A**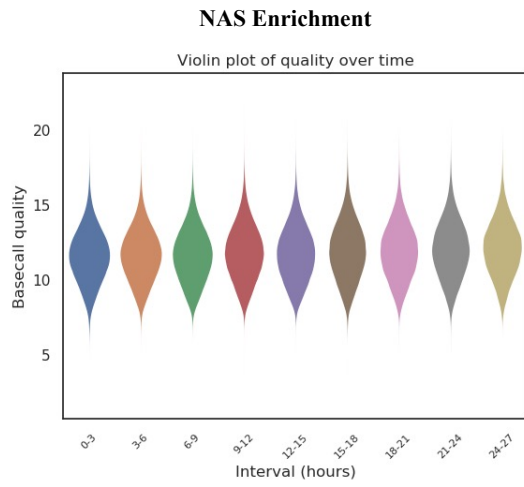**B**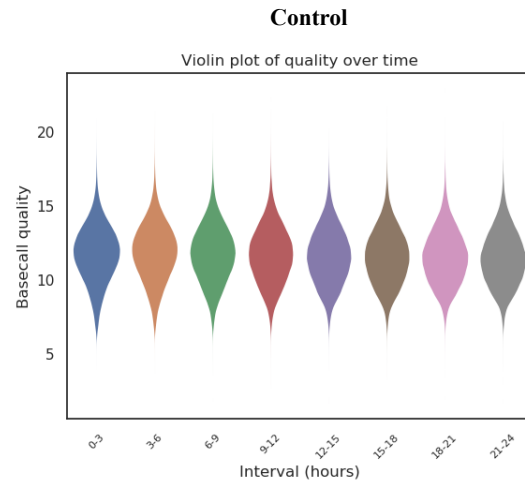

**Supplementary Figure 4.** Violin plots of basecalling quality scores for paired NAS enrichment (A) and control (B) sequencing experiments by run time. Both sequencing strategies generated reads of similar overall average quality scores.

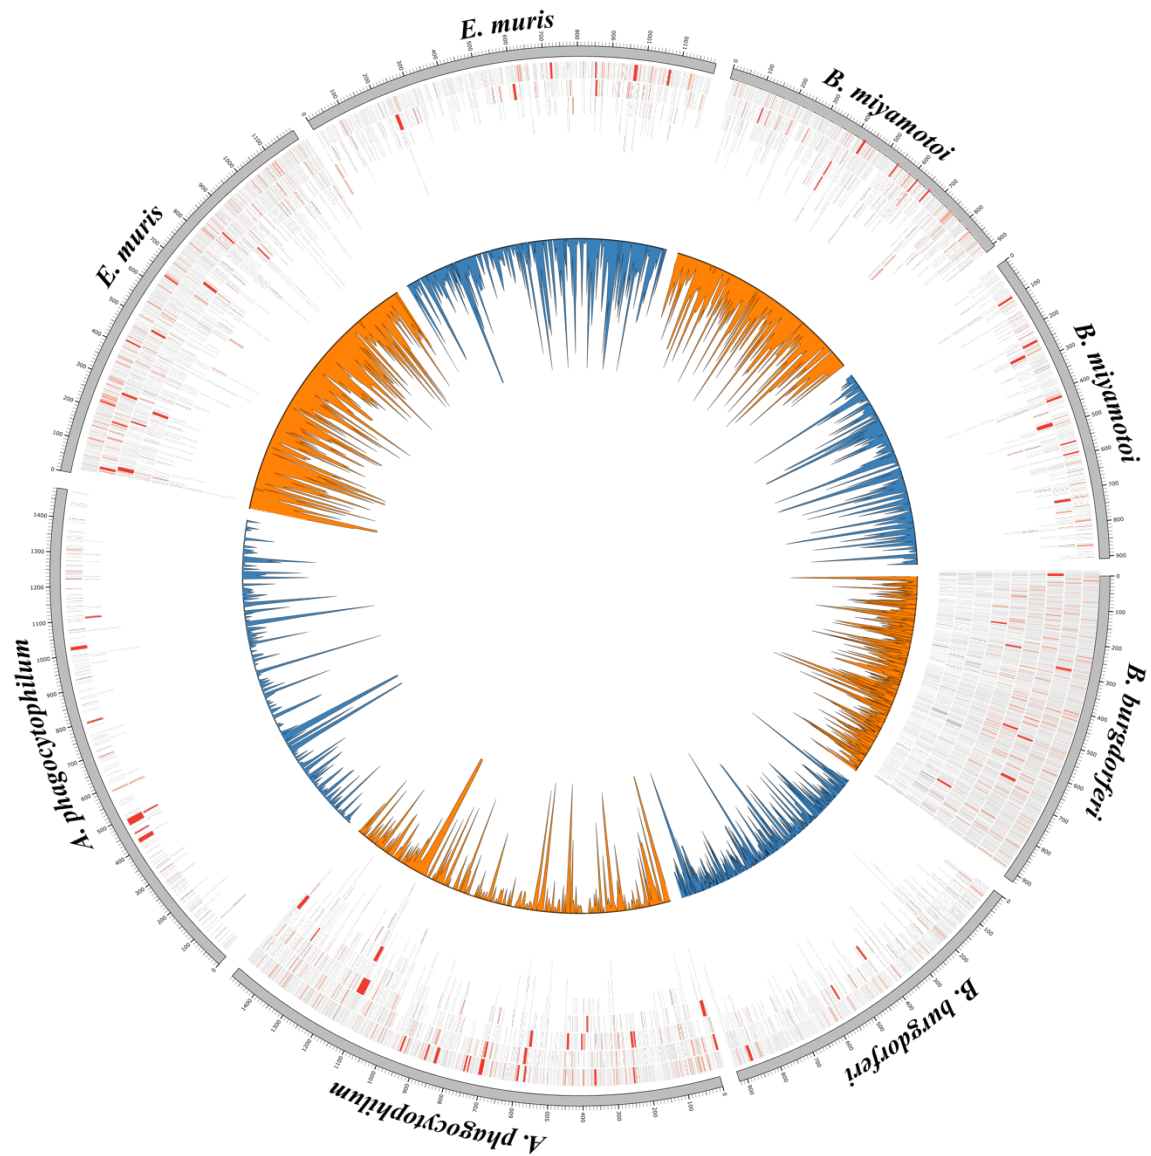

**Supplementary Figure 5.** Circos plot of mapped data from detected tick-borne pathogen genomes recovered during paired NAS enrichment and control sequencing experiments. Individual nanopore reads are shown in gray tick marks with reads >5 kb shown in dark red, and reads >2 kb shown in light red. Histograms of mean coverage of mapped bases across each bacterial genome from ticks sequenced during NAS enrichment is shown in orange, and coverage from ticks sequenced over control experiment shown in blue.

**Supplementary Table 1.** Whole genome and plasmid sequences of known and potential tick-borne pathogens included in enrichment FASTA file for adaptive sampling enrichment and real-time alignment.

| Sequence Number | Organism                   | Group    | Strain  | Sequence Type          | Accession Number | Length (bp) |
|-----------------|----------------------------|----------|---------|------------------------|------------------|-------------|
| 1               | <i>B. burgdorferi</i> s.s. | Bacteria | JD1     | Complete Genome        | CP002312.1       | 922,801     |
| 2               | <i>B. burgdorferi</i> s.s. | Bacteria | JD1     | Plasmid                | CP002316.1       | 26,525      |
| 3               | <i>B. burgdorferi</i> s.s. | Bacteria | JD1     | Plasmid                | CP002310.1       | 60,739      |
| 4               | <i>B. burgdorferi</i> s.s. | Bacteria | JD1     | Plasmid                | CP002323.1       | 30,314      |
| 5               | <i>B. burgdorferi</i> s.s. | Bacteria | JD1     | Plasmid                | CP002309.1       | 29,902      |
| 6               | <i>B. burgdorferi</i> s.s. | Bacteria | JD1     | Plasmid                | CP002321.1       | 30,019      |
| 7               | <i>B. burgdorferi</i> s.s. | Bacteria | JD1     | Plasmid                | CP002320.1       | 29,707      |
| 8               | <i>B. burgdorferi</i> s.s. | Bacteria | JD1     | Plasmid                | CP002307.1       | 30,804      |
| 9               | <i>B. burgdorferi</i> s.s. | Bacteria | JD1     | Plasmid                | CP002311.1       | 31,085      |
| 10              | <i>B. burgdorferi</i> s.s. | Bacteria | JD1     | Plasmid                | CP002322.1       | 30,697      |
| 11              | <i>B. burgdorferi</i> s.s. | Bacteria | JD1     | Plasmid                | CP002313.1       | 17,522      |
| 12              | <i>B. burgdorferi</i> s.s. | Bacteria | JD1     | Plasmid                | CP002308.1       | 22,827      |
| 13              | <i>B. burgdorferi</i> s.s. | Bacteria | JD1     | Plasmid                | CP002306.1       | 24,354      |
| 14              | <i>B. burgdorferi</i> s.s. | Bacteria | JD1     | Plasmid                | CP002314.1       | 28,797      |
| 15              | <i>B. burgdorferi</i> s.s. | Bacteria | JD1     | Plasmid                | CP002318.1       | 30,096      |
| 16              | <i>B. burgdorferi</i> s.s. | Bacteria | JD1     | Plasmid                | CP002317.1       | 24,614      |
| 17              | <i>B. burgdorferi</i> s.s. | Bacteria | JD1     | Plasmid                | CP002324.1       | 26,981      |
| 18              | <i>B. burgdorferi</i> s.s. | Bacteria | JD1     | Plasmid                | CP002319.1       | 29,993      |
| 19              | <i>B. burgdorferi</i> s.s. | Bacteria | JD1     | Plasmid                | CP002315.1       | 22,808      |
| 20              | <i>B. burgdorferi</i> s.s. | Bacteria | JD1     | Plasmid                | CP002325.1       | 27,590      |
| 21              | <i>B. burgdorferi</i> s.s. | Bacteria | JD1     | Plasmid                | CP001652.1       | 52,916      |
| 22              | <i>A. phagocytophilum</i>  | Bacteria | JM      | Complete Genome        | NC_021880.1      | 1,481,598   |
| 23              | <i>Ba. microti</i>         | Protozoa | RI      | Chromosome 1           | FO082871.1       | 1,304,281   |
| 24              | <i>Ba. microti</i>         | Protozoa | RI      | Chromosome 2           | FO082872.1       | 1,508,385   |
| 25              | <i>Ba. microti</i>         | Protozoa | RI      | Chromosome 3           | LN871598.1       | 1,766,409   |
| 26              | <i>Ba. microti</i>         | Protozoa | RI      | Chromosome 4           | LN871599.1       | 1,816,206   |
| 27              | <i>Ba. microti</i>         | Protozoa | RI      | Mitochondrial Genome 1 | LN871602.1       | 10,547      |
| 28              | <i>Ba. microti</i>         | Protozoa | RI      | Mitochondrial Genome 2 | LN871600.2       | 11,149      |
| 29              | <i>Ba. microti</i>         | Protozoa | RI      | Mitochondrial Genome 3 | LN871601.1       | 10,547      |
| 30              | <i>Ba. microti</i>         | Protozoa | RI      | Mitochondrial Genome 4 | LN871603.1       | 10,547      |
| 31              | <i>Ba. microti</i>         | Protozoa | RI      | Apicoplast Genome      | LK028575.1       | 28,657      |
| 32              | <i>E. muris</i>            | Bacteria | AS145   | Complete Genome        | CP006917.1       | 1,196,717   |
| 33              | <i>B. miyamotoi</i>        | Bacteria | LB-2001 | Complete Genome        | CP006647.2       | 907,293     |

|    |                            |          |            |                      |             |           |
|----|----------------------------|----------|------------|----------------------|-------------|-----------|
| 34 | <i>B. miyamotoi</i>        | Bacteria | LB-2001    | Plasmid              | CP010328.2  | 30,673    |
| 35 | <i>B. mayonii</i>          | Bacteria | MN14-15339 | Complete Genome      | CP015796.1  | 904,387   |
| 36 | <i>B. mayonii</i>          | Bacteria | MN14-15339 | Plasmid              | CP015797.1  | 26,835    |
| 37 | <i>B. mayonii</i>          | Bacteria | MN14-15339 | Plasmid              | CP015798.1  | 30,433    |
| 38 | <i>B. mayonii</i>          | Bacteria | MN14-15339 | Plasmid              | CP015799.1  | 27,866    |
| 39 | <i>B. mayonii</i>          | Bacteria | MN14-15339 | Plasmid              | CP015800.1  | 30,330    |
| 40 | <i>B. mayonii</i>          | Bacteria | MN14-15339 | Plasmid              | CP015801.1  | 30,406    |
| 41 | <i>B. mayonii</i>          | Bacteria | MN14-15339 | Plasmid              | CP015802.1  | 17,017    |
| 42 | <i>B. mayonii</i>          | Bacteria | MN14-15339 | Plasmid              | CP015962.1  | 8,307     |
| 43 | <i>B. mayonii</i>          | Bacteria | MN14-15339 | Plasmid              | CP015803.1  | 23,759    |
| 44 | <i>B. mayonii</i>          | Bacteria | MN14-15339 | Plasmid              | CP015804.1  | 24,696    |
| 45 | <i>B. mayonii</i>          | Bacteria | MN14-15339 | Plasmid              | CP015805.1  | 19,566    |
| 46 | <i>B. mayonii</i>          | Bacteria | MN14-15339 | Plasmid              | CP015806.1  | 27,809    |
| 47 | <i>B. mayonii</i>          | Bacteria | MN14-15339 | Plasmid              | CP015807.1  | 32,269    |
| 48 | <i>B. mayonii</i>          | Bacteria | MN14-15339 | Plasmid              | CP015808.1  | 45,035    |
| 49 | <i>B. mayonii</i>          | Bacteria | MN14-15339 | Plasmid              | CP015809.1  | 53,343    |
| 50 | Powassan virus             | Virus    | ctb30      | Complete Genome      | AF311056.1  | 10,800    |
| 51 | <i>Dirofilaria immitis</i> | Helminth | N/A        | Mitochondrial Genome | NC_005305.1 | 13,814    |
| 52 | <i>Bartonella henselae</i> | Bacteria | MVT02      | Complete Genome      | LN879429.1  | 1,905,383 |
